# Supplementary material for: Neurocognitive Impairments Are More Severe in the Binge-Eating/Purging Anorexia Nervosa Subtype Than in the Restricting Subtype
Source: PubMed Central journal article supplement (PMC5911723; doi:10.3389/fpsyt.2018.00138), 2018-04-16
Supplement: Table1.pdf [file Table1.pdf]

## Supplementary Material:

# Neurocognitive Impairments are More Severe in the Binge-eating/Purging Anorexia Nervosa Subtype than in the Restricting Subtype

Hiroko Tamiya, MD<sup>1</sup>, Atushi Ouchi, MA<sup>1</sup>, Runshu Chen, MD<sup>1</sup>, Shiho Miyazawa, PhD<sup>2</sup>, Yoritaka Akimoto, PhD<sup>3</sup>, Yasuhiro Kaneda, MD, PhD<sup>4</sup>, Ichiro Sora, MD, PhD<sup>1\*</sup>

<sup>1</sup>Department of Psychiatry, Kobe University Graduate School of Medicine, Kobe, Japan

<sup>2</sup>Department of Biological Psychiatry, Tohoku University Graduate School of Medicine, Sendai, Japan

<sup>3</sup>Department of Information & Management Systems Engineering, Nagaoka University of Technology, Nagaoka, Japan

<sup>4</sup>Department of Psychiatry, Iwaki Clinic, Tokushima, Japan

\* **Correspondence:** Ichiro Sora, MD, PhD: sora@med.kobe-u.ac.jp

**Supplementary Table 1. Multivariate analysis of covariance for all MCCB-J domains and overall cognitive composite T-scores of the sample**

| MCCB-J domains            | ANR group<br>(n = 21) | ANBP group<br>(n = 17) | Healthy controls<br>(n = 69) | <i>F</i> <sup>a</sup> | <i>p</i> -value | partial<br>$\eta^2$ | Post hoc comparisons                      |
|---------------------------|-----------------------|------------------------|------------------------------|-----------------------|-----------------|---------------------|-------------------------------------------|
|                           | Mean $\pm$ SD         |                        |                              |                       |                 |                     |                                           |
| Processing speed          | 45.35 $\pm$ 8.87      | 39.06 $\pm$ 8.96       | 50.88 $\pm$ 8.91             | 11.69                 | <0.001          | 0.19                | ANBP <HC (p<0.001)                        |
| Attention/vigilance       | 51.63 $\pm$ 8.00      | 43.89 $\pm$ 8.08       | 52.18 $\pm$ 8.03             | 7.18                  | 0.001           | 0.13                | ANBP<ANR(p=0.009)<br>ANBP <HC (p=0.001)   |
| Working memory            | 45.17 $\pm$ 8.53      | 44.48 $\pm$ 8.62       | 50.09 $\pm$ 8.57             | 3.99                  | 0.021           | 0.07                | n. s.                                     |
| Verbal learning           | 52.27 $\pm$ 9.26      | 48.38 $\pm$ 9.35       | 51.90 $\pm$ 9.30             | 1.09                  | 0.339           | 0.02                | n. s.                                     |
| Visual learning           | 45.62 $\pm$ 10.02     | 42.29 $\pm$ 10.12      | 52.80 $\pm$ 10.07            | 8.40                  | <0.001          | 0.14                | ANR < HC (P=0.019)<br>ANBP <HC (P=0.001)  |
| Reasoning/problem-solving | 44.00 $\pm$ 13.23     | 36.56 $\pm$ 13.37      | 48.60 $\pm$ 13.30            | 5.28                  | 0.007           | 0.10                | ANBP <HC (p=0.005)                        |
| Social cognition          | 40.19 $\pm$ 10.32     | 39.77 $\pm$ 10.43      | 49.44 $\pm$ 10.37            | 8.85                  | <0.001          | 0.15                | ANR < HC (p=0.002)<br>ANBP < HC (p=0.004) |
| Overall composite score   | 45.51 $\pm$ 10.32     | 41.19 $\pm$ 10.42      | 49.00 $\pm$ 10.37            | 3.74                  | 0.027           | 0.07                | ANBP < HC (p=0.025)                       |

Abbreviations: ANBP, anorexia nervosa, binge-eating/purging subtype; ANR, anorexia nervosa, restricting subtype; MCCB-J, MATRICS Consensus Cognitive Battery, Japanese-language version; n. s., not significant.
