# Supplementary material for: Neurocognitive Impairments Are More Severe in the Binge-Eating/Purging Anorexia Nervosa Subtype Than in the Restricting Subtype
Source: PubMed Central journal article supplement (PMC5911723; doi:10.3389/fpsyt.2018.00138), 2018-04-16
Supplement: Table2.pdf [file Table2.pdf]

**Supplementary table 2. Multivariate analysis of covariance for MCCB-J subtest T-scores of the sample**

| MCCB-J subtest   | ANR group<br>(n = 21) | ANBP group<br>(n = 17) | Healthy controls<br>(n = 69) | <i>F</i> <sup>a</sup> | <i>p</i> -value | partial<br>$\eta^2$ | Post hoc comparisons                                    |
|------------------|-----------------------|------------------------|------------------------------|-----------------------|-----------------|---------------------|---------------------------------------------------------|
|                  | Mean $\pm$ SD         |                        |                              |                       |                 |                     |                                                         |
| <b>TMT-A</b>     | 35.98 $\pm$ 18.19     | 25.01 $\pm$ 18.37      | 49.24 $\pm$ 18.27            | 12.21                 | <0.001          | 0.20                | ANBP<HC( <i>p</i> <0.001)<br>ANR<HC( <i>p</i> =0.017)   |
| <b>BACS-SC</b>   | 44.96 $\pm$ 9.24      | 41.36 $\pm$ 9.33       | 52.54 $\pm$ 9.29             | 11.15                 | <0.001          | 0.18                | ANBP<HC( <i>p</i> <0.001)<br>ANR<HC( <i>p</i> =0.006)   |
| <b>HVLT-R</b>    | 52.49 $\pm$ 9.30      | 48.60 $\pm$ 9.40       | 52.23 $\pm$ 9.34             | 1.12                  | 0.33            | 0.02                | n. s.                                                   |
| <b>WMS-SS</b>    | 44.76 $\pm$ 10.39     | 45.77 $\pm$ 10.50      | 49.58 $\pm$ 10.44            | 1.93                  | 0.15            | 0.04                | n. s.                                                   |
| <b>LNS</b>       | 45.64 $\pm$ 9.85      | 43.36 $\pm$ 9.95       | 50.02 $\pm$ 9.90             | 3.41                  | 0.037           | 0.06                | n. s.                                                   |
| <b>NAB</b>       | 43.96 $\pm$ 13.22     | 36.70 $\pm$ 13.35      | 48.25 $\pm$ 13.28            | 4.86                  | 0.010           | 0.09                | ANBP<HC( <i>p</i> =0.007)                               |
| <b>BVMT-R</b>    | 45.49 $\pm$ 9.94      | 42.09 $\pm$ 10.04      | 52.67 $\pm$ 9.99             | 8.61                  | <0.001          | 0.15                | ANBP<HC( <i>p</i> =0.001)<br>ANR<HC( <i>p</i> =0.018)   |
| <b>Fluency</b>   | 54.46 $\pm$ 11.59     | 50.37 $\pm$ 11.71      | 51.38 $\pm$ 11.65            | 0.75                  | 0.475           | 0.02                | n. s.                                                   |
| <b>MSCEIT-ME</b> | 40.31 $\pm$ 10.34     | 39.85 $\pm$ 10.45      | 49.45 $\pm$ 10.39            | 8.64                  | <0.001          | 0.15                | ANBP<HC( <i>p</i> =0.004)<br>ANR<HC( <i>p</i> =0.003)   |
| <b>CPT-IT</b>    | 51.53 $\pm$ 7.93      | 43.77 $\pm$ 8.01       | 52.16 $\pm$ 7.97             | 7.46                  | 0.001           | 0.13                | ANBP<HC( <i>p</i> =0.001)<br>ANBP<ANR( <i>p</i> =0.008) |

Abbreviations: ANBP, anorexia nervosa, binge-eating/purging type subtype; ANR, anorexia nervosa, restricting subtype; BACS-SC, Brief Assessment of Cognition in Schizophrenia–Symbol Coding test; BVMT-R, Brief Visuospatial Memory Test-Revised; CPT-IP, Continuous Performance Test–Identical Pairs; Fluency, Category Fluency–Animal Naming test; HVLT-R, Hopkins Verbal Learning Test-Revised; LNS, University of Maryland–Letter-Number Span test; MCCB, MATRICS Consensus Cognitive Battery, Japanese-language version; MSCEIT-ME, Mayer-Salovey-Caruso Emotional Intelligence Test, Managing Emotions component; NAB, Neuropsychological Assessment Battery–Mazes; SD, standard deviation; TMT-A, Trail Making Test, part A; WMS-SS, Wechsler Memory Scale III Spatial Span test; n. s., not significant.

<sup>a</sup> Multivariate analysis of covariance controlling for age, IQ, and educational level.
