# Supplementary material for: Neurocognitive Impairments Are More Severe in the Binge-Eating/Purging Anorexia Nervosa Subtype Than in the Restricting Subtype
Source: PubMed Central journal article supplement (PMC5911723; doi:10.3389/fpsyt.2018.00138), 2018-04-16
Supplement: Table3.pdf [file Table3.pdf]

**Supplementary table 3. Partial correlations of MCCB-J domain scores with chart-recorded minimum BMIs, BMIs at assessment, and illness durations with the three demographic variables (i.e., IQ, age, and years of education) as control variables**

| Cognitive domains         |          | ANR group                   |                    |                  | ANBP group                  |                    |                  |
|---------------------------|----------|-----------------------------|--------------------|------------------|-----------------------------|--------------------|------------------|
|                           |          | Chart-recorded minimum BMIs | BMIs at assessment | Illness duration | Chart-recorded minimum BMIs | BMIs at assessment | Illness duration |
| Processing speed          | <i>r</i> | -0.032                      | 0.049              | -0.270           | 0.042                       | 0.252              | 0.239            |
|                           | <i>p</i> | 0.899                       | 0.846              | 0.279            | 0.892                       | 0.406              | 0.431            |
| Attention/vigilance       | <i>r</i> | -0.099                      | -0.197             | 0.034            | -0.407                      | -0.038             | 0.232            |
|                           | <i>p</i> | 0.697                       | 0.434              | 0.894            | 0.168                       | 0.903              | 0.445            |
| Working memory            | <i>r</i> | 0.082                       | 0.162              | 0.021            | 0.269                       | 0.358              | -0.112           |
|                           | <i>p</i> | 0.748                       | 0.520              | 0.935            | 0.374                       | 0.230              | 0.717            |
| Verbal learning           | <i>r</i> | -0.113                      | 0.043              | 0.109            | -0.085                      | 0.059              | 0.331            |
|                           | <i>p</i> | 0.655                       | 0.867              | 0.668            | 0.783                       | 0.849              | 0.269            |
| Visual learning           | <i>r</i> | -0.062                      | 0.303              | 0.249            | -0.127                      | -0.153             | 0.335            |
|                           | <i>p</i> | 0.806                       | 0.222              | 0.320            | 0.679                       | 0.619              | 0.264            |
| Reasoning/problem-solving | <i>r</i> | -0.061                      | -0.021             | 0.290            | 0.036                       | -0.343             | 0.238            |
|                           | <i>p</i> | 0.810                       | 0.934              | 0.243            | 0.906                       | 0.251              | 0.433            |
| Social cognition          | <i>r</i> | -0.361                      | 0.120              | 0.278            | 0.149                       | -0.169             | 0.507            |
|                           | <i>p</i> | 0.142                       | 0.636              | 0.264            | 0.627                       | 0.580              | 0.077            |
| Overall composite score   | <i>r</i> | -0.135                      | 0.103              | 0.166            | -0.034                      | -0.040             | 0.346            |
|                           | <i>p</i> | 0.595                       | 0.685              | 0.511            | 0.913                       | 0.897              | 0.247            |

Abbreviations: ANBP, anorexia nervosa, binge-eating/purging type subtype; ANR, anorexia nervosa, restricting subtype; BMI, body mass index; EDE-Q, Eating Disorder Examination-Questionnaire; MCCB-J, MATRICS Consensus Cognitive Battery, Japanese-language version.

All correlation coefficients are Pearson coefficients. We defined statistical significance as  $p < 0.05$ .
